# Supplementary material for: Chemometric Evaluation of RI-Induced Phytochemicals in Phaseolus vulgaris Seeds Indicate an Improvement on Liver Enzymes in Obese Rats
Source: MDPI journal article supplement (doi:10.3390/molecules28247983), 2023-12-07
Supplement: s1 [file s1]

# Chemometric Evaluation of RI-Induced Phytochemicals in *Phaseolus vulgaris* Seeds Indicate an Improvement on Liver Enzymes in Obese Rats

Mayra Denise Herrera <sup>1,2</sup>, Iza Fernanda Pérez-Ramírez <sup>3</sup>, Rosalía Reynoso-Camacho <sup>3</sup>,  
Luis Roberto Reveles-Torres <sup>1,2</sup>, Miguel Servín-Palestina <sup>1</sup>, Angelica Judith Granados-López <sup>2</sup>,  
Claudia Araceli Reyes-Estrada <sup>4,\*</sup> and Jesús Adrián López <sup>2,\*</sup>

<sup>1</sup> Campo Experimental Zacatecas (CEZAC-INIFAP), Carretera Zacatecas-Fresnillo Km 24.5, Calera de VR, Zacatecas 98500, Mexico; mayradherrera@gmail.com (M.D.H.); lreveles@gmail.com (L.R.R.-T.); servin.miguel@inifap.gob.mx (M.S.-P.)

<sup>2</sup> Unidad Académica de Ciencias Biológicas, Universidad Autónoma de Zacatecas “Francisco García Salinas”, Avenida Preparatoria No. 301, Colonia Hidráulica, Zacatecas 98068, Mexico; agranados@uaz.edu.mx

<sup>3</sup> Research and Graduate Studies in Food Science, Faculty of Chemistry, Autonomous University of Queretaro, Queretaro 76010, Mexico; iza.perez@uaq.mx (I.F.P.-R.); rrcamachomx@yahoo.com.mx (R.R.-C.)

<sup>4</sup> Unidad Académica de Ciencias Químicas, Universidad Autónoma de Zacatecas, Campus Siglo XXI, Villanueva-Zacatecas, La Escondida, Zacatecas 98160, Mexico

\* Correspondence: c\_reyes13@uaz.edu.mx (C.A.R.-E.); jalopez@uaz.edu.mx (J.A.L.)

Table S1. Variable Importance in Projection (VIP) scores.

| Phytochemical | Serum    |          | Liver    |          |
|---------------|----------|----------|----------|----------|
|               | AST, ALT | GGT, ALP | AST, ALT | GGT, ALP |
| F_1           | 1.152    | 1.057    | 0.343    | 0.831    |
| F_2           | 1.045    | 1.060    | 0.534    | 0.794    |
| F_3           | 0.497    | 0.840    | 1.086    | 0.772    |
| F_4           | 0.533    | 0.909    | 1.061    | 0.903    |
| F_5           | 0.893    | 1.080    | 0.699    | 0.835    |
| F_6           | 1.060    | 1.155    | 0.474    | 0.920    |
| F_7           | 0.932    | 1.190    | 0.679    | 0.986    |
| F_8           | 1.175    | 1.091    | 0.259    | 0.878    |
| F_9           | 1.108    | 1.149    | 0.395    | 0.912    |
| F_10          | 1.227    | 1.042    | 0.156    | 0.866    |
| F_11          | 1.217    | 1.054    | 0.181    | 0.869    |
| F_12          | 1.151    | 1.057    | 0.346    | 0.830    |
| F_13          | 0.784    | 0.715    | 1.246    | 1.205    |
| F_14          | 0.871    | 0.893    | 1.463    | 1.384    |
| F_15          | 1.326    | 0.482    | 1.374    | 1.246    |
| F_16          | 1.148    | 1.127    | 0.328    | 0.897    |
| F_17          | 1.255    | 0.988    | 0.165    | 0.827    |
| F_18          | 1.076    | 1.080    | 0.466    | 0.835    |
| F_19          | 0.871    | 0.893    | 1.463    | 1.384    |
| F_20          | 1.372    | 0.194    | 1.174    | 1.189    |
| F_21          | 1.326    | 0.482    | 1.374    | 1.246    |
| F_22          | 1.204    | 0.905    | 0.745    | 0.633    |

|      |       |       |       |       |
|------|-------|-------|-------|-------|
| F_23 | 0.670 | 1.341 | 1.237 | 1.241 |
| F_24 | 1.247 | 0.445 | 1.384 | 1.306 |
| F_25 | 0.747 | 1.189 | 0.964 | 1.112 |
| F_26 | 0.786 | 1.113 | 0.833 | 0.967 |
| F_27 | 0.503 | 1.463 | 1.365 | 1.026 |
| F_28 | 1.247 | 0.445 | 1.384 | 1.306 |
| F_29 | 0.859 | 1.295 | 0.855 | 1.078 |
| F_30 | 0.213 | 1.324 | 1.319 | 0.527 |
| PA_1 | 1.199 | 0.927 | 0.628 | 0.664 |
| PA_2 | 0.793 | 1.024 | 0.838 | 0.646 |
| PA_3 | 1.157 | 0.984 | 0.506 | 0.719 |
| PA_4 | 0.950 | 1.040 | 1.252 | 0.475 |
| O_1  | 0.678 | 0.853 | 1.214 | 1.181 |
| O_2  | 0.702 | 1.255 | 1.551 | 1.364 |
| O_3  | 0.600 | 0.993 | 0.956 | 0.763 |
| S_1  | 0.653 | 1.197 | 1.437 | 0.452 |
| S_2  | 1.312 | 0.856 | 0.524 | 0.745 |
| S_3  | 0.815 | 0.854 | 1.375 | 1.333 |
| S_4  | 1.234 | 0.986 | 0.275 | 0.800 |
| S_5  | 1.028 | 0.544 | 1.340 | 1.306 |
| S_6  | 0.728 | 0.905 | 1.301 | 1.279 |

VIP scores were obtained for hepatocellular (AST, ALT) and hepatobiliary (GGT, ALP) function separately for serum and liver samples.

Table S2. *p* values for liver enzymes activity evaluated in serum

| <b>Tukey's multiple comparisons test</b> | <b>Adjusted P Value</b> | <b>Tukey's multiple comparisons test</b> | <b>Adjusted P Value</b> |
|------------------------------------------|-------------------------|------------------------------------------|-------------------------|
| <b>Serum AST</b>                         |                         | <b>Serum GGT</b>                         |                         |
| Healthy ctrol vs. Obese ctrol            | <0.0001                 | Healthy ctrol vs. Obese ctrol            | <0.0001                 |
| Healthy ctrol vs. 100/100                | <0.0001                 | Healthy ctrol vs. 100/100                | 0.4671                  |
| Healthy ctrol vs. 100/50                 | 0.0978                  | Healthy ctrol vs. 100/50                 | 0.8685                  |
| Healthy ctrol vs. 50/50                  | 0.0335                  | Healthy ctrol vs. 50/50                  | 0.0327                  |
| Healthy ctrol vs. 50/100                 | 0.012                   | Healthy ctrol vs. 50/100                 | 0.0082                  |
| Obese ctrol vs. 100/100                  | 0.9997                  | Obese ctrol vs. 100/100                  | 0.0019                  |
| Obese ctrol vs. 100/50                   | 0.0092                  | Obese ctrol vs. 100/50                   | 0.0003                  |
| Obese ctrol vs. 50/50                    | 0.0302                  | Obese ctrol vs. 50/50                    | 0.0622                  |
| Obese ctrol vs. 50/100                   | 0.0783                  | Obese ctrol vs. 50/100                   | 0.1941                  |
| 100/100 vs. 100/50                       | 0.0188                  | 100/100 vs. 100/50                       | 0.9804                  |
| 100/100 vs. 50/50                        | 0.0582                  | 100/100 vs. 50/50                        | 0.7255                  |
| 100/100 vs. 50/100                       | 0.1408                  | 100/100 vs. 50/100                       | 0.3861                  |

|                               |         |                               |         |
|-------------------------------|---------|-------------------------------|---------|
| 100/50 vs. 50/50              | 0.9965  | 100/50 vs. 50/50              | 0.3128  |
| 100/50 vs. 50/100             | 0.9432  | 100/50 vs. 50/100             | 0.1129  |
| 50/50 vs. 50/100              | 0.9981  | 50/50 vs. 50/100              | 0.9928  |
| <b>Serum ALT</b>              |         | <b>Serum GGT</b>              |         |
| Healthy ctrol vs. Obese ctrol | <0.0001 | Healthy ctrol vs. Obese ctrol | <0.0001 |
| Healthy ctrol vs. 100/100     | 0.0002  | Healthy ctrol vs. 100/100     | 0.0042  |
| Healthy ctrol vs. 100/50      | 0.1031  | Healthy ctrol vs. 100/50      | 0.0396  |
| Healthy ctrol vs. 50/50       | 0.0019  | Healthy ctrol vs. 50/50       | 0.0002  |
| Healthy ctrol vs. 50/100      | 0.0014  | Healthy ctrol vs. 50/100      | 0.0015  |
| Obese ctrol vs. 100/100       | 0.9561  | Obese ctrol vs. 100/100       | 0.4308  |
| Obese ctrol vs. 100/50        | 0.0255  | Obese ctrol vs. 100/50        | 0.0876  |
| Obese ctrol vs. 50/50         | 0.5468  | Obese ctrol vs. 50/50         | 0.9612  |
| Obese ctrol vs. 50/100        | 0.6174  | Obese ctrol vs. 50/100        | 0.6667  |
| 100/100 vs. 100/50            | 0.1614  | 100/100 vs. 100/50            | 0.943   |
| 100/100 vs. 50/50             | 0.9561  | 100/100 vs. 50/50             | 0.8921  |
| 100/100 vs. 50/100            | 0.9761  | 100/100 vs. 50/100            | 0.9988  |
| 100/50 vs. 50/50              | 0.5821  | 100/50 vs. 50/50              | 0.3852  |
| 100/50 vs. 50/100             | 0.5118  | 100/50 vs. 50/100             | 0.7902  |
| 50/50 vs. 50/100              | >0.9999 | 50/50 vs. 50/100              | 0.983   |

Table S3. *p* values for liver enzymes activity evaluated in hepatic tissue

| Tukey's multiple comparisons test |                  | Tukey's multiple comparisons test |                  |
|-----------------------------------|------------------|-----------------------------------|------------------|
|                                   | Adjusted P Value |                                   | Adjusted P Value |
| <b>Liver AST</b>                  |                  | <b>Liver GGT</b>                  |                  |
| Healthy ctrol vs. Obese ctrol     | <0.0001          | Healthy ctrol vs. Obese ctrol     | 0.042            |
| Healthy ctrol vs. 100/100         | 0.0962           | Healthy ctrol vs. 100/100         | 0.3391           |
| Healthy ctrol vs. 100/50          | 0.8953           | Healthy ctrol vs. 100/50          | 0.972            |
| Healthy ctrol vs. 50/50           | 0.9803           | Healthy ctrol vs. 50/50           | 0.1337           |
| Healthy ctrol vs. 50/100          | 0.9992           | Healthy ctrol vs. 50/100          | 0.9875           |
| Obese ctrol vs. 100/100           | 0.0739           | Obese ctrol vs. 100/100           | 0.909            |
| Obese ctrol vs. 100/50            | 0.0008           | Obese ctrol vs. 100/50            | 0.0054           |
| Obese ctrol vs. 50/50             | <0.0001          | Obese ctrol vs. 50/50             | <0.0001          |
| Obese ctrol vs. 50/100            | <0.0001          | Obese ctrol vs. 50/100            | 0.0078           |
| 100/100 vs. 100/50                | 0.5748           | 100/100 vs. 100/50                | 0.0768           |
| 100/100 vs. 50/50                 | 0.0171           | 100/100 vs. 50/50                 | 0.0005           |
| 100/100 vs. 50/100                | 0.1979           | 100/100 vs. 50/100                | 0.102            |

|                               |         |                               |         |
|-------------------------------|---------|-------------------------------|---------|
| 100/50 vs. 50/50              | 0.5004  | 100/50 vs. 50/50              | 0.4872  |
| 100/50 vs. 50/100             | 0.9803  | 100/50 vs. 50/100             | >0.9999 |
| 50/50 vs. 50/100              | 0.8953  | 50/50 vs. 50/100              | 0.4102  |
| <b>Liver ALT</b>              |         | <b>Liver GGT</b>              |         |
| Healthy ctrol vs. Obese ctrol | 0.0093  | Healthy ctrol vs. Obese ctrol | <0.0001 |
| Healthy ctrol vs. 100/100     | 0.2943  | Healthy ctrol vs. 100/100     | 0.4446  |
| Healthy ctrol vs. 100/50      | 0.5504  | Healthy ctrol vs. 100/50      | 0.0312  |
| Healthy ctrol vs. 50/50       | 0.7677  | Healthy ctrol vs. 50/50       | 0.2984  |
| Healthy ctrol vs. 50/100      | >0.9999 | Healthy ctrol vs. 50/100      | 0.0296  |
| Obese ctrol vs. 100/100       | 0.6626  | Obese ctrol vs. 100/100       | <0.0001 |
| Obese ctrol vs. 100/50        | 0.3883  | Obese ctrol vs. 100/50        | <0.0001 |
| Obese ctrol vs. 50/50         | 0.2158  | Obese ctrol vs. 50/50         | 0.0445  |
| Obese ctrol vs. 50/100        | 0.0093  | Obese ctrol vs. 50/100        | 0.385   |
| 100/100 vs. 100/50            | 0.9977  | 100/100 vs. 100/50            | 0.7706  |
| 100/100 vs. 50/50             | 0.9665  | 100/100 vs. 50/50             | 0.0035  |
| 100/100 vs. 50/100            | 0.2943  | 100/100 vs. 50/100            | 0.0001  |
| 100/50 vs. 50/50              | 0.9992  | 100/50 vs. 50/50              | <0.0001 |
| 100/50 vs. 50/100             | 0.5504  | 100/50 vs. 50/100             | <0.0001 |
| 50/50 vs. 50/100              | 0.7677  | 50/50 vs. 50/100              | 0.887   |

---
